# Supplementary material for: When Property Rights Meet Social Capital: The Differentiated Impact of Land Certification on Farm Mechanization
Source: Research Square preprint supplement (doi:10.21203/rs.3.rs-6303702/v1), 2025-06-30
Supplement: Supplementary file 1 [file 12bef50d394655c29c2938e3.docx]

**Appendix A**

Since this study excludes the sample of farmers not engaged in agricultural production, there is a potential risk of selection bias. Specifically, it is possible that even if these farmers were engaged in agricultural production, they might not necessarily make additional investments in agricultural machinery under the land certification policy. To address the potential inconsistencies arising from this sample selection bias, the Heckman correction is applied. In the first stage of the Heckman procedure, the dependent variable is a binary indicator of whether the household has ceased agricultural production. Using a probit model, the probability of farmland rental and the inverse Mills ratio (IMR) are calculated for the entire sample. Given that the most significant factor prompting farmers to abandon agricultural production is the shift of agricultural labor to non-agricultural industries—typically labor-intensive sectors—this study employs the transfer index of labor-intensive industries from 2004 to 2013 in the relevant province as the identifying variable for the first-stage regression.

Finally, the IMR is included as a control variable in the OLS regression equation to correct for potential sample selection bias. The results presented in the table below demonstrate that the main conclusions of the study remain robust even after accounting for this potential bias.

Heckman two-step test

|  | (1) | (2) |
| --- | --- | --- |
|  | First step：Probit | Second step：OLS |
|  | whether the family has given up agricultural production | IHS  agricultural investment |
| Transfer_index | 0.1847*** |  |
|  | (0.0456) |  |
| Ownership | -0.4696*** | 0.3920** |
|  | (0.0783) | (0.1770) |
| IMR |  | 0.3683 |
|  |  | (0.2434) |
| CV | Yes | Yes |
| FE |  | Yes |
| N | 8191 | 5763 |
| (Pseudo)R2 | 0.7522 | 0.2049 |

Note：1.Based on existing literature, a series of fundamental indicators such as the number of enterprises, output value, employment figures, and fixed asset investment, are firstly selected as basic indicators to measure the level of industrial development in a given region. Secondly, a comprehensive indicator system are constructed to thoroughly assess the situation of industrial relocation. This typically includes dimensions such as geographic density (i.e., the intensity of industrial activity per unit area), the level of specialization (i.e., the degree of concentration and specialization of a particular industry within a region), and industrial similarity (i.e., the degree of similarity in industrial structure between different regions). Finally, statistical and mathematical methods such as weighted summation, principal component analysis, and the entropy method are employed to comprehensively reflect the performance of various regions in terms of industrial relocation. For detailed procedures, please refer to the cited literature. For detailed explanation, please refer to Sun et al., (2018). 2.According to China Industrial Economic Statistical Yearbook, labor-intensive industries mainly include: A-agriculture, forestry, animal husbandry, fisheries, B-mining; D-electricity, heat, gas and water productions and supply; E-construction, F-wholesale and retail; G-transportation, warehousing and postal services; H-accommodation and catering; O-resident services, repair and other services; S-others industry unidentified; C13-agricultural and sideline food processing industry; C14-food manufacturing industry; C15-wine, beverage and refined tea manufacturing industry; C17-textile industry; C18-textile and clothing industry; C19-leather, fur, feathers and footwear industry; C20-wood processing and wood, bamboo, rattan, palm, grass products industry; C21-furniture manufacturing industries.

**Appendix B**

Property rights and machinery inputs of households

|  | (1) | (2) | (3) | (4) | (5) | (6) |
| --- | --- | --- | --- | --- | --- | --- |
|  | IHS  (Total machinery inputs of household) | | | Ln  (1+Total machinery inputs of household) | | |
| Treat_post | 0.4291*** | 0.4259*** | 0.4235*** | 0.6509*** | 0.6401*** | 0.6008*** |
|  | (0.0498) | (0.0495) | (0.0515) | (0.1524) | (0.1520) | (0.1579) |
| Age |  | -0.0032*** | -0.0020*** |  | -0.0148*** | -0.0098*** |
|  |  | (0.0008) | (0.0008) |  | (0.0030) | (0.0030) |
| Gender |  | 0.0746*** | 0.0592** |  | 0.2550*** | 0.1883** |
|  |  | (0.0248) | (0.0245) |  | (0.0908) | (0.0910) |
| Edu |  | 0.0223** | 0.0078 |  | 0.1050*** | 0.0434 |
|  |  | (0.0091) | (0.0092) |  | (0.0370) | (0.0372) |
| Health |  | 0.0099 | -0.0013 |  | 0.0803*** | 0.0270 |
|  |  | (0.0073) | (0.0070) |  | (0.0284) | (0.0271) |
| Status |  | 0.1063** | 0.1053*** |  | 0.3882*** | 0.3616*** |
|  |  | (0.0415) | (0.0403) |  | (0.1375) | (0.1318) |
| Member_total |  |  | 0.0167** |  |  | 0.0624*** |
|  |  |  | (0.0065) |  |  | (0.0227) |
| Labor_share |  |  | 0.1048* |  |  | 0.4676* |
|  |  |  | (0.0601) |  |  | (0.2400) |
| Agrilabor_share |  |  | -0.0421 |  |  | -0.1544 |
|  |  |  | (0.0570) |  |  | (0.2267) |
| Nonagrilabor_share |  |  | -0.1270** |  |  | -0.5714** |
|  |  |  | (0.0569) |  |  | (0.2343) |
| Insur_coverage |  |  | 0.0844** |  |  | 0.2554* |
|  |  |  | (0.0427) |  |  | (0.1384) |
| Income_total |  |  | 0.0249*** |  |  | 0.1180*** |
|  |  |  | (0.0093) |  |  | (0.0369) |
| Exp_consump |  |  | 0.0359*** |  |  | 0.1663*** |
|  |  |  | (0.0100) |  |  | (0.0378) |
| Value_agri |  |  | 0.0257*** |  |  | 0.0950*** |
|  |  |  | (0.0044) |  |  | (0.0140) |
| Exp_hiring |  |  | 0.0216*** |  |  | 0.0758*** |
|  |  |  | (0.0043) |  |  | (0.0150) |
| Area(Log，Mu) |  |  | -0.0018 |  |  | 0.0013 |
|  |  |  | (0.0032) |  |  | (0.0154) |
| Market_index |  |  | 0.1059*** |  |  | 0.5124*** |
|  |  |  | (0.0149) |  |  | (0.0602) |
| Subsidy |  |  | 0.0512 |  |  | 0.1758 |
|  |  |  | (0.0425) |  |  | (0.1540) |
| Cons | 2.1290*** | 2.1470*** | 0.5701 | 4.9557*** | 5.0090*** | -1.4879 |
|  | (0.0061) | (0.0613) | (0.3544) | (0.0187) | (0.2428) | (1.2844) |
| Household FE | Yes | Yes | Yes | Yes | Yes | Yes |
| Year FE | Yes | Yes | Yes | Yes | Yes | Yes |
| N | 6639 | 6611 | 6331 | 6639 | 6611 | 6331 |
| R2 | 0.2086 | 0.2173 | 0.2596 | 0.2073 | 0.2205 | 0.2670 |

Note: The results are obtained by replacing the acres of machinery inputs by the total household machinery inputs as the explanatory variables. The results reveal again that the land ownership policy significantly promotes the total machinery inputs of household at the 1% statistical level. *, **, *** indicates significance level of 10%, 5% and 1%, respectively. The value in parentheses represent robust standard error.

**Appendix C**

Kernel density plots for propensity score matching

Note: Propensity score matching (PSM) is used to balance between the treatment and control samples.

**Appendix D**

Results by the entropy balancing method

| variable | mean in raw control units | mean in reweighted control units | variance in raw control units | variance in reweighted control units | variance in reweighted control units | skewness in reweighted control units | std diff between treated and raw control group | std diff between treated and reweighted control group |
| --- | --- | --- | --- | --- | --- | --- | --- | --- |
| Age | 55.2080 | 55.7731 | 14.0080 | 13.6360 | 0.0914 | 0.0351 | 0.0519 | 0.0001 |
| Gender | 0.8771 | 0.9058 | 0.1078 | 0.0853 | -2.2978 | -2.7792 | 0.0986 | 0.0004 |
| Edu | 2.5239 | 2.5884 | 0.9800 | 1.0182 | 0.7167 | 0.7584 | 0.0710 | 0.0002 |
| Health | 2.9004 | 2.9851 | 1.2476 | 1.2342 | 0.1491 | 0.0579 | 0.0772 | 0.0002 |
| Status | 0.0404 | 0.0594 | 0.0388 | 0.0559 | 4.6669 | 3.7295 | 0.0802 | 0.0001 |
| Member_total | 4.2724 | 4.2360 | 3.3751 | 3.5829 | 1.0054 | 1.0311 | -0.0207 | -0.0001 |
| Labor_share | 0.6638 | 0.6727 | 0.0647 | 0.0641 | -0.2589 | -0.2554 | 0.0350 | 0.0001 |
| Agrilabor_share | 0.4150 | 0.4430 | 0.0920 | 0.0983 | 0.5175 | 0.4301 | 0.0932 | 0.0002 |
| Nonagrila_share | 0.1959 | 0.1843 | 0.0487 | 0.0458 | 0.9693 | 1.0008 | -0.0541 | -0.0001 |
| Insura_coverage | 0.5703 | 0.6412 | 0.0983 | 0.0963 | 0.0850 | -0.1576 | 0.2275 | 0.0005 |
| Income | 9.9293 | 10.0522 | 1.4074 | 1.3541 | -0.4790 | -0.2820 | 0.1089 | 0.0003 |
| Exp_consump | 9.7137 | 9.8502 | 1.0407 | 1.0275 | -0.2935 | -0.1712 | 0.1405 | 0.0003 |
| Value_agri | 6.4072 | 6.3143 | 6.7040 | 7.5123 | -1.5027 | -1.3959 | -0.0336 | 0.0000 |
| Subsidy | 4.6647 | 4.9037 | 6.2476 | 5.8318 | -1.0649 | -1.2169 | 0.0976 | 0.0002 |
| Exp_hiring | 0.5853 | 0.6227 | 3.5817 | 3.8032 | 3.1779 | 3.0977 | 0.0197 | 0.0001 |

Note: The results are obtained by the entropy balancing method which uses the first-order moments (means) and second-order moment (variances) of the control variables for matching. Unlike the propensity score matching method, the entropy balancing method is able to better balance the differences between the treatment and control groups.
